# Expression Profiling in *Bemisia tabaci* under Insecticide Treatment: Indicating the Necessity for Custom Reference Gene Selection

Pei Liang<sup>1</sup>✉, Yajie Guo<sup>1</sup>✉, Xuguo Zhou<sup>2\*</sup>, Xiwu Gao<sup>1\*</sup>

**1** Department of Entomology, China Agricultural University, Beijing, P. R. China, **2** Department of Entomology, University of Kentucky, Lexington, Kentucky, United States of America

## Abstract

Finding a suitable reference gene is the key for qRT-PCR analysis. However, none of the reference gene discovered thus far can be utilized universally under various biotic and abiotic experimental conditions. In this study, we further examine the stability of candidate reference genes under a single abiotic factor, insecticide treatment. After being exposed to eight commercially available insecticides, which belong to five different classes, the expression profiles of eight housekeeping genes in the sweetpotato whitefly, *Bemisia tabaci*, one of the most invasive and destructive pests in the world, were investigated using qRT-PCR analysis. In summary, *elongation factor 1 $\alpha$*  (*EF1 $\alpha$* ),  *$\alpha$ -tubulin* (*TUB1 $\alpha$* ) and *glyceraldehyde-3-phosphate dehydrogenase* (*GAPDH*) were identified as the most stable reference genes under the insecticide treatment. The initial assessment of candidate reference genes was further validated with the expression of two target genes, a P450 (*Cyp6cm1*) and a glutathione *S*-transferase (*GST*). However, ranking of reference genes varied substantially among intra- and inter-classes of insecticides. These combined data strongly suggested the necessity of conducting custom reference gene selection designed for each and every experimental condition, even when examining the same abiotic or biotic factor.

**Citation:** Liang P, Guo Y, Zhou X, Gao X (2014) Expression Profiling in *Bemisia tabaci* under Insecticide Treatment: Indicating the Necessity for Custom Reference Gene Selection. PLoS ONE 9(1): e87514. doi:10.1371/journal.pone.0087514

**Editor:** Guy Smagghe, Ghent University, Belgium

**Received:** September 15, 2013; **Accepted:** December 22, 2013; **Published:** January 31, 2014

**Copyright:** © 2014 Liang et al. This is an open-access article distributed under the terms of the Creative Commons Attribution License, which permits unrestricted use, distribution, and reproduction in any medium, provided the original author and source are credited.

**Funding:** This research was supported by the National Basic Research and Development Program (2009CB119200) and the National 863 Plan (project 2012AA101502). The funders had no role in study design, data collection and analysis, decision to publish, or preparation of the manuscript.

**Competing Interests:** The authors have declared that no competing interests exist.

\* E-mail: xuguozhou@uky.edu (XZ); gaoxiwu@263.net.cn (XG)

✉ These authors contributed equally to this work.

## Introduction

Quantitative real-time reverse transcription polymerase chain reaction (qRT-PCR) is one of the most effective and sensitive techniques for gene expression analysis [1–4]. However, enabling comparisons across different samples, qRT-PCR data must be normalized to correct variations in pipetting, RNA concentration, reverse-transcription, and efficiency of PCR amplification [2,5,6]. The most common normalization method is to compare the mRNA level of the target gene with that of a reference gene whose expression level is considered stable regardless of different experimental conditions [7–9]. However, none of the reference genes discovered thus far is consistently expressed in a universal and invariant way under various experimental conditions [10,11], and recent reference gene selection studies indicate that a single reference gene is generally insufficient to normalize the expression data of all target genes [12–16].

In insect, the reference genes have been validated at least in the desert locust *Schistocerca gregaria* [17], the oriental fruit fly *Bactrocera dorsalis* [18], the fruit fly *Drosophila melanogaster* [19] emerald ash borer *Agrilus planipennis* [20], the diamondback moth *Plutella xylostella* [21], the tobacco whitefly *Bemisia tabaci* [22], and the red imported fire ant, *Solenopsis invicta* [23] under a diverse set of biotic and abiotic conditions. However, no one single universal reference was identified, either. Therefore, it is not surprising that

no single universal reference is available for four different lepidopteran insect species [24]. In this context, reliable reference genes for gene expression analysis based on different experimental conditions should be selected.

The tobacco whitefly, *B. tabaci*, is an invasive insect pest of agriculture and horticulture worldwide [25]. Because of the application of chemical insecticides has been the primary strategy for the control of *B. tabaci*, this pest has developed different levels of resistance to a wide range of insecticides [26–33]. It has been well documented that insecticide resistance in *B. tabaci* usually is associated with enhanced detoxification by oxidative and hydrolytic pathways [34–36]. Therefore, increasing numbers of studies are using the RT-qPCR techniques to detect the changes of mRNA expression of detoxifying enzymes genes in resistant populations and tried to provide new insights into insecticides resistance mechanisms [37,38].

Though the suitable reference genes has been documented in bacterially challenged bees [39], in *Tribolium* beetles infected with fungus [40], in plant virus infected *B. tabaci* [22] and in Bt toxin treated *P. xylostella* [21], this kind of information is lacking for insects stressed by different types of chemical insecticides.

In this study, a set of reliable reference genes for gene expression analysis in the *B. tabaci* biotype Q, one of the most invasive and destructive pest in the world, after exposure to eight commonly used insecticides (which belong to five different classes) was

selected and then valuated with two target genes, a P450 gene (*Cyp6cm1*) and glutathione *S*-transferase gene (*GST*). Over expression of the P450 has been proved to be responsible for neonicotinoid insecticides resistance in *B. tabaci* [35,37] while this is not the case for *GST*. The objective of this work is to provide a set of universal reliable reference genes for research of genes with toxicological function in *B. tabaci*.

## Materials and Methods

### Ethics Statement

*Bemisia tabaci* biotype Q strains used in this study were initially collected in the field at Beijing in 2010, and have been maintained in our laboratory at the China Agricultural University for three years without exposure to any insecticide. No specific permit was required for the described field collections, and the location is not privately-owned or protected in any way. The species in the genus of *Bemisia* are common agricultural pests and are not included in the “List of Endangered and Protected Animals in China”.

### Leaf-dip bioassay and *B. tabaci* susceptibility to various insecticides

A total of eight kinds of insecticides commonly been used in the management of *B. tabaci* were used in this study, including chlorpyrifos, beta-cypermethrin, carbosulfan, abamectin, buprofezin and three neonicotinoids (imidacloprid, acetamiprid, nitenpyram). All insecticides used were of technical grade with purity greater than 95%.

First, the  $LC_{50}$  of each insecticide to *Bemisia tabaci* biotype Q was determined using the leaf-dip method [41]. Briefly, the stock solution of insecticide was diluted to five to seven concentrations with 0.02% Triton X-100, then eggplant leaf discs (33 mm in diameter) were dipped in aqueous solutions of insecticides for 10 s. After being air-dried for 1 h, the leaf disc was placed abaxial side down on the bed of agar (2%) within the plug seal cap of a 100 ml centrifuge tube (the bottom of the tube was cut off and covered with a piece of black cotton cloth, the tube was 8 cm in height and 3.8 cm in diameter). Approximately 30–50 adult whiteflies were transferred into the tubes and the tubes were thereafter covered with the caps (with leaf disc inside). Adult whiteflies treated with 0.02% Triton X-100 were used as control. Four replicates of each concentration were carried out. The adults were allowed to feed on the treated disc for 48 h or 72 h (depending on classes of insecticide) at  $25 \pm 2^\circ\text{C}$ , 75% RH, and a 16:8-h (light:dark) photoperiod.  $LC_{50}$  values and their virulence regression equation slope were calculated using PoloPlus™ software (LeOra Software, Berkeley, USA). The bioassay results were listed in Table S1.

And then the similar leaf-dip method was used for treatment of *B. tabaci* except that the eggplant leaf discs were dipped at a concentration corresponding to the  $LC_{50}$  of each insecticide, respectively. About 300 adults were treated for each insecticide. The adults were allowed to feed on the treated disc for 48 h at  $25 \pm 2^\circ\text{C}$ , 50–70% RH, and a 12:12 h (light: dark) photoperiod. Adult whiteflies treated with 0.02% Triton X-100 were used as control. The surviving insects were collected for subsequent RNA extraction. Three biological replicates were performed for each insecticide treatment.

### Total RNA extraction and cDNA synthesis

Total RNA was extracted from 100 to 150 *B. tabaci* adults using Trizol Reagen (Invitrogen, Carlsbad, CA) following the manufacturer's instructions. RNA concentration and quality were measured according to the optical density at 260 nm and the A260/A280 absorption ratio using a NAS-99 spectrophotometer

(ACTGene, USA). RNA samples with an A260/A280 ratio ranging from 1.8 to 2.0 and A260/A230 > 2.0 were used for analysis. All RNA samples were adjusted to the same concentration to homogenize RNA input in the subsequent reverse-transcription reaction. One microgram of RNA was reverse transcribed into first-strand cDNA using a Thermo Scientific Verso™ cDNA Synthesis Kit (Thermo Scientific, Wilmington, DE, USA). The cDNA was stored at  $-20^\circ\text{C}$  until use.

### Primer design and quantitative real-time PCR

A total of eight candidate reference genes, including five commonly used reference genes,  $\beta$ -actin (*ACT*),  $\alpha$ -tubulin (*TUB1 $\alpha$* ), elongation factor 1 $\alpha$  (*EF1 $\alpha$* ), glyceraldehyde-3-phosphate dehydrogenase (*GAPDH*) and 18S ribosomal RNA (*18S rRNA*), as well as three rarely used reference genes ribosomal protein L13a (*RPL13A*), cyclophilin 1 (*CYP1*) and TATA box binding protein-associated factor (*TBP-AF*) in *B. tabaci* were chosen for valuation of their expression stability in *B. tabaci*. The sequences, length of products, and source of these candidate genes were listed in Table 1.

Real-time PCR was conducted using an ABI 7500 Real Time PCR System (Applied Biosystems, Foster, CA) and the ROX's Platinum SYBR Green qPCR SuperMix-UDG kit (Invitrogen, Carlsbad, CA). The reactions were performed in a 20  $\mu\text{L}$  mixture contained 1  $\mu\text{L}$  of cDNA template, 10  $\mu\text{L}$  of SYBR Green qPCR SuperMix-UDG, 1  $\mu\text{L}$  of each primer and 7  $\mu\text{L}$  of nuclease-free water. The optimized real-time PCR program consisted of an initial step at  $50^\circ\text{C}$  for 2 min,  $95^\circ\text{C}$  for 2 min, followed by 40 cycles of  $95^\circ\text{C}$  for 15 s and  $60^\circ\text{C}$  for 30 s. Relative standard curves for the transcripts were generated with serial dilutions of cDNA (1/5, 1/15, 1/45, 1/135, and 1/405). The corresponding qRT-PCR efficiencies (E) were calculated according to the equation:  $E = (10^{[-1/\text{slope}]}) - 1 \times 100$  [42]. Three independent biological duplications were performed for all the reference genes studied and data for each biological duplicate were carried out in triplicate. The dissociation curves were obtained after amplification to inspect the specificity of the primer sets.

### Statistical analysis

The raw data of qPCR were analyzed using ABI 7500 SDS System software (version 2.0) (Applied Biosystems) and the threshold cycle (Ct value, the cycle at which the fluorescent signal was first significantly different from the background) for each gene-cDNA sample was determined automatically. All biological replicates (each contained three technical replications) were used to calculate the average Ct values using geNorm and NormFinder software packages as described in their manuals. Ct values were converted into relative quantities and imported into the geNorm and the NormFinder software for further analysis. The geNorm provides a measure of gene expression stability (M), and creates stability ranking via a stepwise exclusion of the least stable gene. Genes with the lowest M values have the most stable expression. The geNorm also calculates a serial values of  $V_n/V_{n+1}$ , which indicates the pairwise variation between two sequential normalization factors and determines the optimal number of reference genes required for accurate normalization. A value below 0.15 indicates that an additional reference gene will not significantly improve normalization. Ct values were converted into relative quantities and further analyzed by RefFinder, a user-friendly web-based comprehensive tool (<http://www.leonxie.com/referencegene.php>), to evaluate the expression stabilities of candidate reference genes. The RefFinder was developed for evaluating and screening reference genes from the extensive experimental datasets. It integrated the currently available major computational programs (geNorm, Normfinder, BestKeeper, and the comparative  $\Delta\text{Ct}$  method)

**Table 1.** Candidate reference genes and primers used for qRT-PCR analysis.

| Gene            | Molecular function                         | Accession No. | Primer sequences (5' to 3') <sup>a</sup>      | Product length (bp) | Tm <sup>b</sup> (°C) | E <sup>c</sup> | R <sup>2d</sup> |
|-----------------|--------------------------------------------|---------------|-----------------------------------------------|---------------------|----------------------|----------------|-----------------|
| <i>ACT</i>      | β-actin                                    | AF071908      | F:ACCGCAAGATTCATACCC R:CGTGCCTCCACCTCATT      | 127                 | 60                   | 103.5          | 0.996           |
| <i>TUB1α</i>    | Tubulin alpha-1 chain                      | EE598061      | F:CACTGTTGTTCTCGTGGC R:AGTGGACGAAAGCAGCCTTG   | 140                 | 60                   | 93.6           | 0.999           |
| <i>EF1α</i>     | elongation factor1-alpha                   | EE600682      | F:GATGGCACGGAGACAATATG R:TGTGAGTGGGTCTGCTAGG  | 138                 | 60                   | 94.5           | 0.995           |
| <i>GAPDH</i>    | glyceraldehyde-3-phosphate dehydrogenase   | JU470454      | F:AAATGACTTTCCCTACAGC R:ATTATGGCGTGATGCC      | 82                  | 60                   | 90.2           | 0.996           |
| <i>18S rRNA</i> | 18S ribosomal RNA                          | Z15051        | F:CGGCTACCACATCCAAGGAA R:GCTGGAATTACCGCGGCT   | 112                 | 60                   | 92.6           | 0.998           |
| <i>RPL13A</i>   | ribosomal protein L13a                     | EE596312      | F:CATTCCACTACAGAGCTCCA R:TTCAGGTTTCGGATGGCTT  | 101                 | 60                   | 99.2           | 0.996           |
| <i>CYP1</i>     | cyclophilin 1                              | EE596217      | F:CACCGTGCATCCCCAACTT R:GTGTGCTTGAGGGTGAAGTT  | 118                 | 60                   | 88.5           | 0.997           |
| <i>TBP-AF</i>   | TATA box binding protein-associated factor | EE596204      | F:TGTGGGACACCCATTATCAG R:TGTGCAGCCAAGGAAATAAG | 162                 | 60                   | 96.5           | 0.995           |
| <i>CYP6CM1</i>  | cytochrome P450 CYP6cm1                    | GQ214539      | F:GCCATCGGTGATAAAGGAGA R:AACTCGTTTCCTCATCGTG  | 128                 | 60                   | 91.4           | 0.996           |
| <i>GST5</i>     | Glutathione S-transferase gene             | EU723684      | F:GTGGAGAAAAACCCCTCA R:AGTCGGTTTTGGCCTCTTT    | 97                  | 60                   | 90.8           | 0.995           |

<sup>a</sup>: F, forward primer; R, reverse primer.  
<sup>b</sup>: Tm, Melting temperature.  
<sup>c</sup>: E, Efficiency.  
<sup>d</sup>: R<sup>2</sup>, Coefficient of correlation.  
 doi:10.1371/journal.pone.0087514.t001

[11,43–45] to compare and rank the tested candidate reference genes. Based on the rankings from each program, it assigns an appropriate weight to an individual gene and calculated the geometric mean of their weights for the overall final ranking. Then starting with the most stable genes the *geNorm* program was used to calculate the pair-wise variation V of two consecutive normalization factors (NF) that result from stepwise introduction of another gene, and the generally adopted threshold of V = 0.15 was used for decision of the most reliable reference gene combination.

One-way ANOVA was used to compare the relative expression levels of selected target genes (*Cyp6cm1* and *GST*) calculated using three and more sets of optimal reference genes, and Student's *t-test* for comparison of target gene expression calculated with two sets of reference genes. Both statistical analysis were conducted using SPSS 17.0 for windows (SPSS Inc., Chicago, IL) with a significance level set at *P* = 0.05.

**Results**

**Amplification specificity and efficiency of the primer sets**

Single peaks in the dissociation curves further demonstrated the specificity of all primer sets (data not shown). A standard curve was generated for each gene, using three-fold serial dilutions of the pooled cDNA generated from each experiment. The correlation coefficient and PCR efficiency characterizing each standard curve are given in Table 1. Box plots of raw Ct values of the candidate reference genes among samples were produced respectively, from which the expression stability of the candidate reference genes can be told intuitively (Fig. 1). The eight candidate reference genes expressed different transcription levels from each other, with Ct values spanning 14.23–26.91, in which the lowest Ct (and highest expression) corresponded to 18SrRNA and the highest Ct to *EF1α*.

**Expression stability analysis of the candidate genes and optimum number of genes for normalization**

The expression profiles of the eight candidate reference genes were assessed in *B. tabaci* treated with eight different insecticides belong to five classes. For the whiteflies treated by LC<sub>50</sub> of

abamectin, according to the ranking of stability generated with *RefFinder*, *RPL13A* was the most stable gene with the lowest ranking value (1.8) followed by *CYP1*, *TUB1α*, *ACT*, *GAPDH*, *EF1α*, *TBP-AF* and the *18SrRNA* was the most unstable one (Figure 2A). If we consider the generally adopted threshold of V = 0.15, the *geNorm* analysis revealed that two most stable genes are needed for a reliable normalization, because of the addition of a third gene does not result in any appreciable improvement of the normalization factor (Figure 3). Thus the *RPL13A* and *CYP1* were identified as the most stable pair of genes.

Similar analyses were conducted for the remaining treatments. For the whiteflies treated by LC<sub>50</sub> of imidacloprid, the eight candidate reference genes were ranked (from the highest to lowest stability) by the *RefFinder* as *TUB1α* < *RPL13A* < *TBP-AF* <

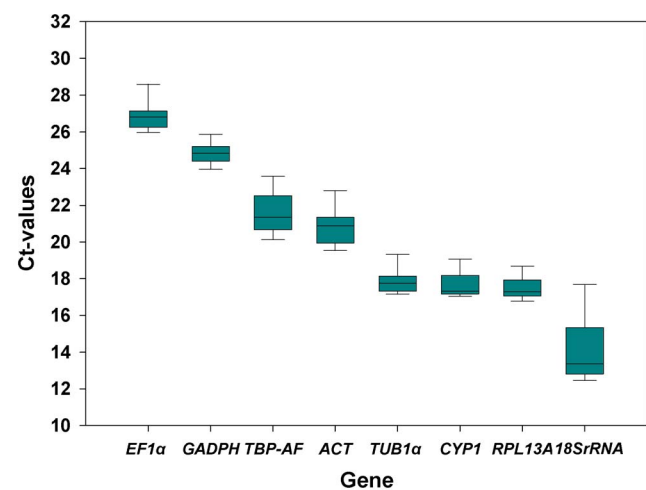

**Figure 1. Expression levels of candidate reference genes.** The expression level of candidate *Bemisia tabaci* reference genes in the tested samples is shown in terms of the cycle threshold number (Ct-value). The box plot indicates the mean of duplicate samples; the whiskers indicate the standard error of the mean.  
 doi:10.1371/journal.pone.0087514.g001

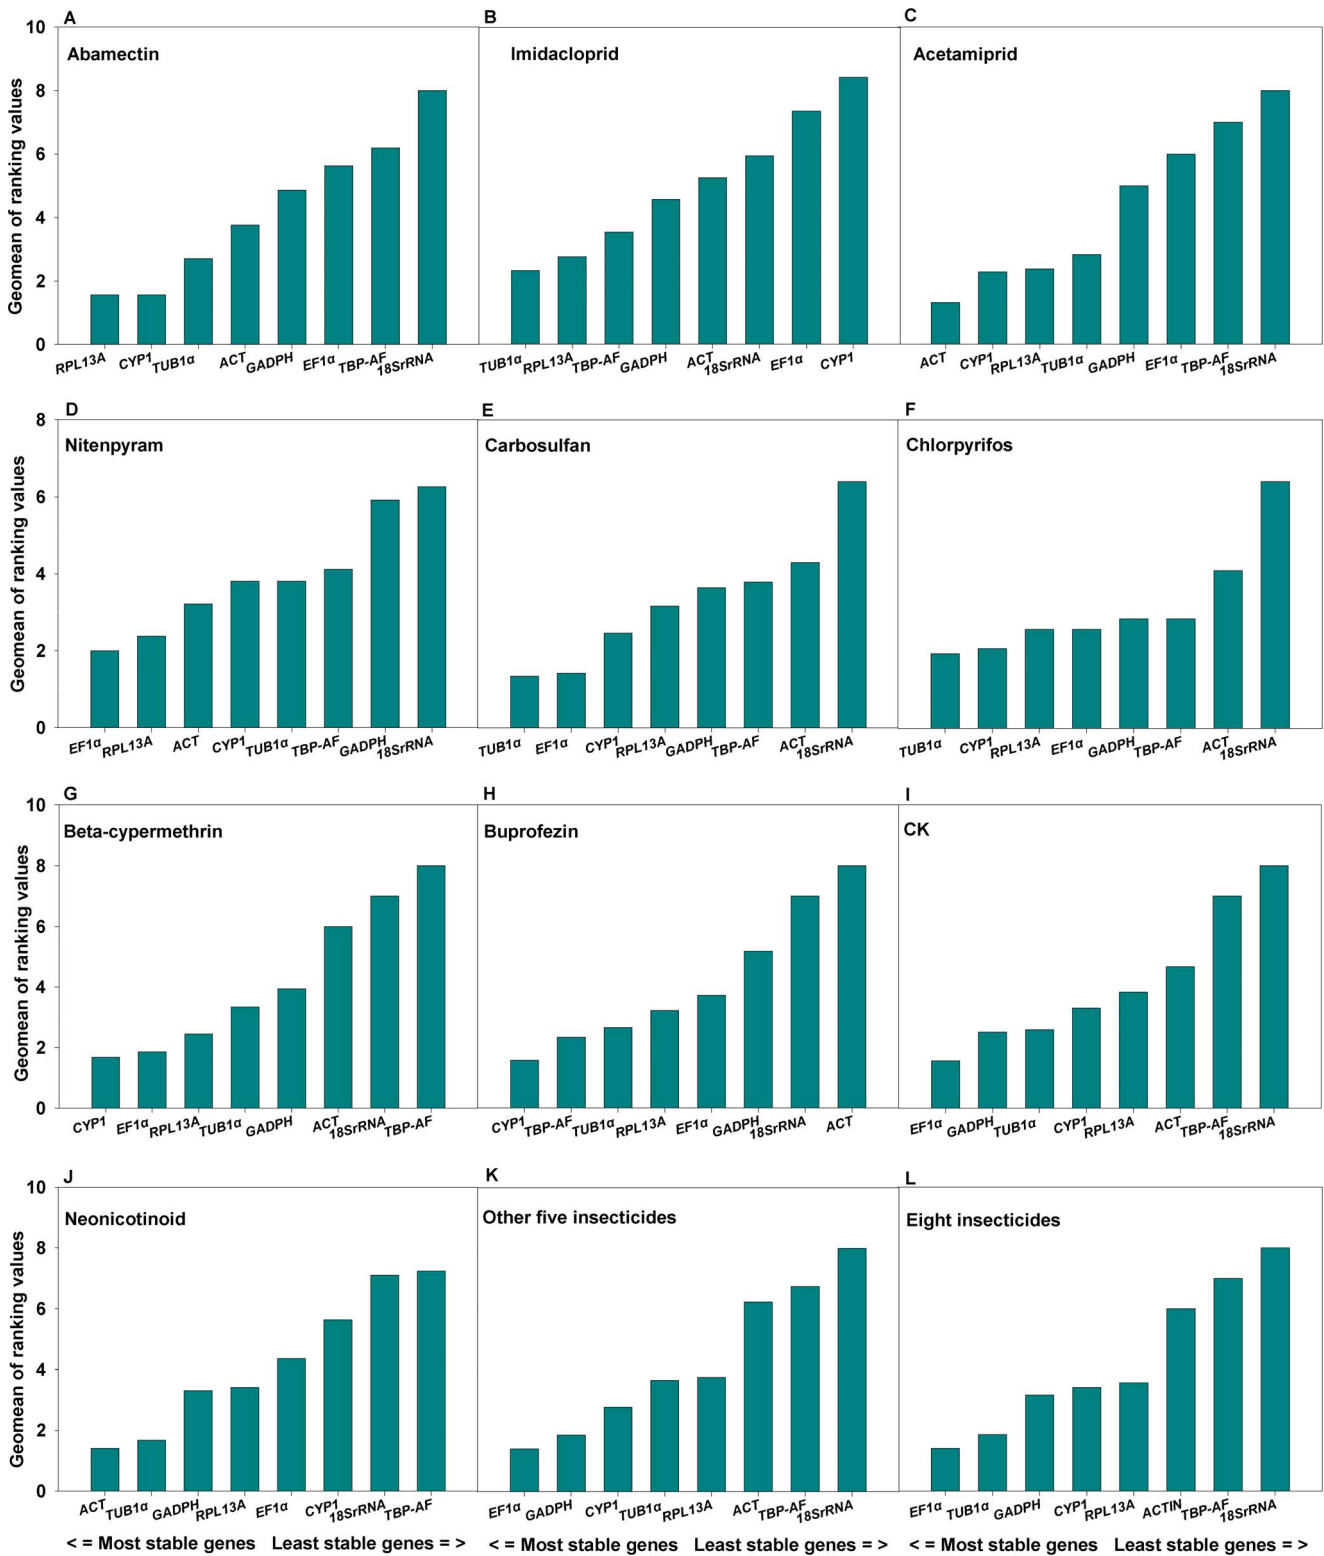

**Figure 2. Expression stabilities of the candidate reference genes.** The average expression stability of the reference genes was measured using Geomean method by *RefFinder*. A lower Geomean of ranking value indicates more stable expression. **CK:** Treated with 0.02% Triton X-100 only. **Other 5 insecticides:** treated by chlorpyrifos, beta-cypermethrin, carbosulfan, abamectin and buprofezin, respectively. **Eight insecticides:** treated with each of eight insecticides used in this work. doi:10.1371/journal.pone.0087514.g002

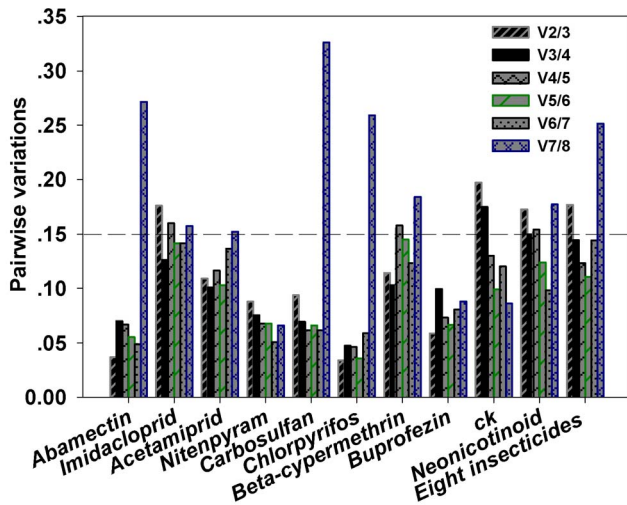

**Figure 3. Optimal number of reference genes for normalization in *Bemisia tabaci*.** Average pairwise variations (V) were calculated in *geNorm* between the normalization factors NFn and NFn+1 to indicate whether inclusion of an extra reference gene would add to the stability of the normalization factor. The value of Vn/Vn+1 indicates the pairwise variation between two sequential normalization factors and determines the optimal number of reference genes required for accurate normalization. A value below 0.15 indicates that an additional reference gene will not significantly improve normalization. doi:10.1371/journal.pone.0087514.g003

*GADPH*<*ACT*<*18S*rRNA<*EF1*α<*CYP1* (Figure 2B). And the *geNorm* analysis revealed the optimum combination of *TUB1*α, *RPL13A* and *TBP-AF* possessed the least variation in their expression ratios (Figure 3), therefore these three genes were identified as the most stable reference gene set.

For the acetamiprid treated group, the order of gene expression stability (from the most stable to the least stable) was calculated as *ACT*<*CYP1*<*RPL13A*<*TUB1*α<*GADPH*<*EF1*α<*TBP-AF*<*18S*rRNA by *RefFinder* (Figure 2C). And the *geNorm* analysis revealed the optimum pair of genes with least variation was *ACT* and *CYP1* (Figure 3). Therefore, the reference genes of *ACT* and *CYP1* were identified as the most stable pair of genes.

In whiteflies treated with LC<sub>50</sub> of nitenpyram, the eight candidate reference genes were ranked (from the highest to lowest stability) by the *RefFinder* as *EF1*α<*RPL13A*<*ACT*<*CYP1*<*TUB1*α<*TBP-AF*<*GADPH*<*18S*rRNA (Figure 2D). And the results of *geNorm* analysis identified *EF1*α and *RPL13A* as the most stable reference gene pair.

For the carbosulfan treated group, according to *RefFinder*, the expression stability (from the highest to the lowest) of the eight candidate reference genes was ranked as *TUB1*α<*EF1*α<*CYP1*<*RPL13A*<*GADPH*<*TBP-AF*<*ACT*<*18S*rRNA (Figure 2E). Analysis with *geNorm* (Figure 3) revealed that the *TUB1*α and *EF1*α made of the most stable gene pair.

In the chlorpyrifos treated group, the overall final order of the genes from the most stable to the least stable was: *TUB1*α<*CYP1*<*RPL13A*<*EF1*α<*GADPH*<*TBP-AF*<*ACT*<*18S*rRNA (Figure 2F). And the *TUB1*α and *CYP1* were identified as the most stable reference gene pair according to the V values calculated with the *GeNorm* (Figure 3).

Stabilities of the eight genes expressed in *B. tabaci* treated with beta-cypermethrin were ordered as *CYP1*<*EF1*α<*RPL13A*<*TUB1*α<*GADPH*<*ACT*<*18S*rRNA<*TBP-AF* (Figure 2G). Combined with the V value calculated by *GeNorm* (Figure 3), the reference

genes *CYP1* and *EF1*α were considered the most reliable pair for gene expression normalization.

For the buprofezin treated group, the expression stability of the eight genes were ranked as *CYP1*<*TBP-AF*<*TUB1*α<*RPL13A*<*EF1*α<*GADPH*<*18S*rRNA<*ACT* by *RefFinder* from the highest to the lowest (Figure 2H). Considering the V value resulted from the *GeNorm* analysis *CYP1* and *TBP-AF* were identified as the most stable gene pair.

The stability order of the eight genes expressed in the control (untreated) group, from the most stable to the least stable, was lined as *EF1*α<*GADPH*<*TUB1*α<*CYP1*<*RPL13A*<*ACT*<*TBP-AF*<*18S*rRNA (Figure 2I). And the *GeNorm* analysis revealed that *EF1*α and *GADPH* was the optimum gene pair for a reliable normalization.

When the imidacloprid, acetamiprid and nitenpyram treated group was combined as neonicotinoid treated group, the stability of the eight candidate genes (from the highest to the lowest) was ranked as *ACT*<*TUB1*α<*GADPH*<*RPL13A*<*EF1*α<*CYP1*<*18S*rRNA<*TBP-AF* (Figure 2J). And according to the V values, *ACT*, *TUB1*α and *GADPH* was considered as the most stable reference gene set for normalization.

Combining all the five non-neonicotinoid insecticides together for consideration, the *RefFinder* ranked the eight tested gene from the most stable to the least stable as *EF1*α<*GADPH*<*CYP1*<*TUB1*α<*RPL13A*<*ACT*<*TBP-AF*<*18S*rRNA (Figure 2K). And further analysis by the *GeNorm* identified *EF1*α, *GADPH* and *CYP1* together as a reliable reference gene set.

Finally, all whitefly groups treated with eight insecticides were analyzed together and designated as the comprehensive group. According to *RefFinder*, from the most to the least stable reference genes, the overall ranking of the eight candidates across different developmental stages was: *EF1*α<*TUB1*α<*GADPH*<*CYP1*<*RPL13A*<*ACT*<*TBP-AF*<*18S*rRNA (Figure 2L). As a result, *EF1*α, *TUB1*α and *GADPH* were considered as the most stable reference genes for qRT-PCR normalization (Table 2).

**Validation of selected reference genes in *B. tabaci***

The relative expression levels of two target genes, *Cyp6CM1* and *GST*, were analyzed after whiteflies treated with three neonicotinoid insecticides. No significant differences were found among the expressions of *Cyp6CM1* and *GST* using five different sets of reference genes (*P*>0.05) (Fig. 4 A–C). Similarly, when normalized with their respective optimal reference genes for each of the five non-neonicotinoid insecticides, expression levels of *Cyp6CM1* and

**Table 2. Selected reference genes under different insecticide treatments.**

| Insecticide class           | Insecticide       | Reference genes                                |
|-----------------------------|-------------------|------------------------------------------------|
| Avermectins                 | Abamectin         | <i>RPL13A</i> and <i>CYP1</i>                  |
| Neonicotinoids              | Imidacloprid      | <i>TUB1</i> α, <i>RPL13A</i> and <i>TBP-AF</i> |
|                             | Acetamiprid       | <i>ACT</i> and <i>CYP1</i>                     |
|                             | Nitenpyram        | <i>EF1</i> α and <i>RPL13A</i>                 |
| Carbamates                  | Carbosulfan       | <i>TUB1</i> α and <i>EF1</i> α                 |
| Organophosphates            | Chlorpyrifos      | <i>TUB1</i> α and <i>CYP1</i>                  |
| Pyrethroids                 | Beta-cypermethrin | <i>CYP1</i> and <i>EF1</i> α                   |
| Chitin synthesis inhibitors | Buprofezin        | <i>CYP1</i> and <i>TBP-AF</i>                  |
|                             | Neonicotinoid     | <i>ACT</i> , <i>TUB1</i> α and <i>GADPH</i>    |
|                             | Comprehensive     | <i>EF1</i> α, <i>TUB1</i> α and <i>GADPH</i>   |

doi:10.1371/journal.pone.0087514.t002



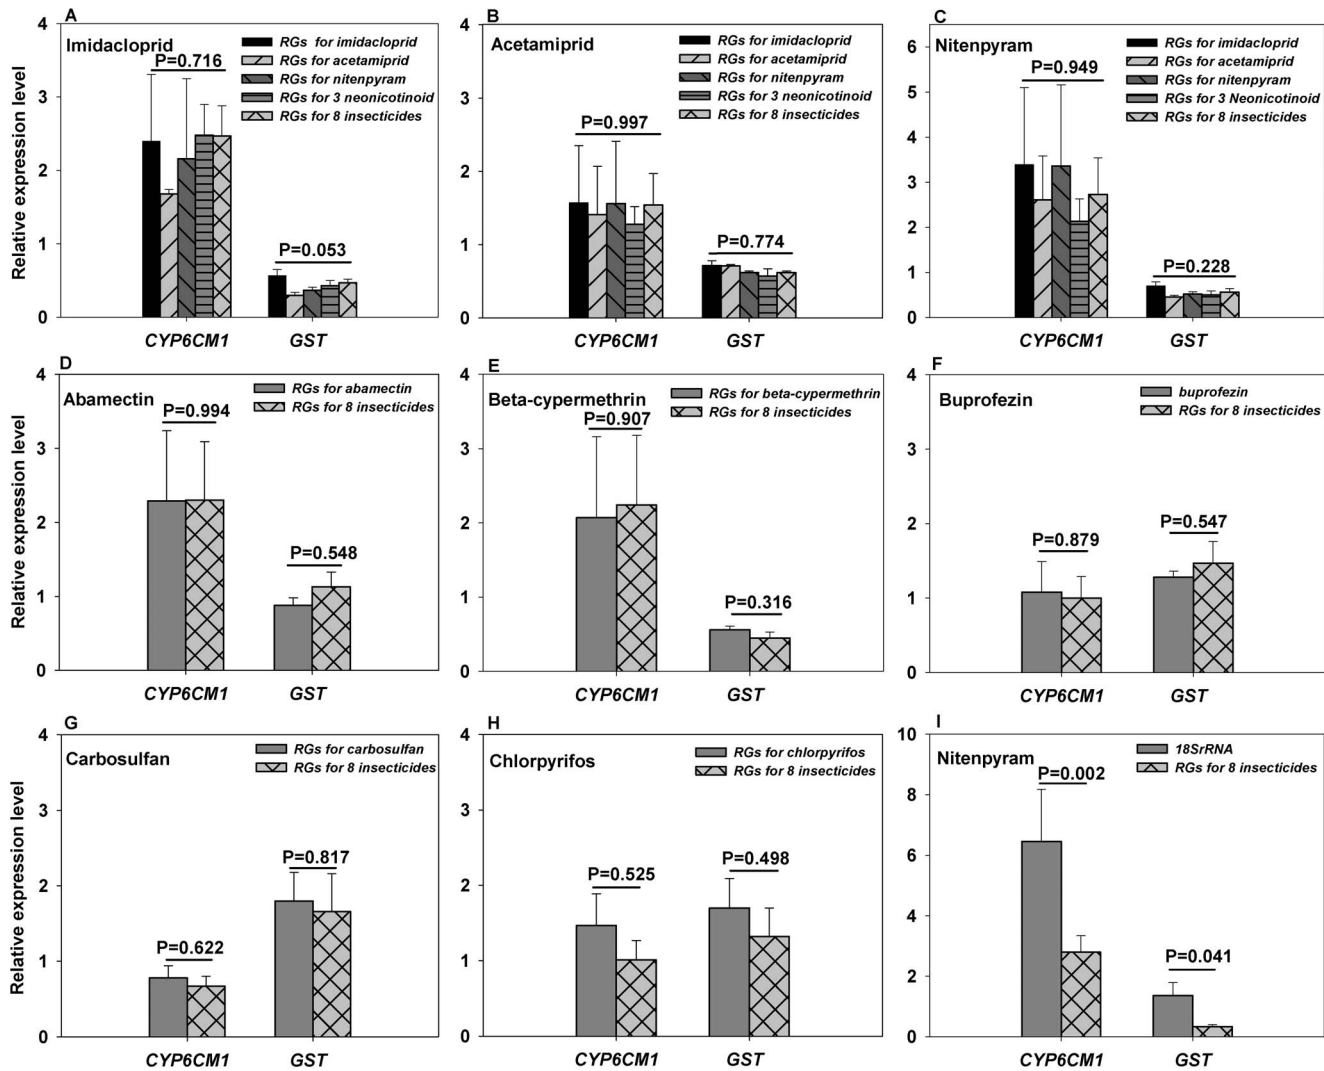

**Figure 4. Relative expressions of target genes calculated using different sets of reference genes.** The relative expression level of the two target genes were calculated according to the  $2^{-\Delta\Delta Ct}$  method (Pfaffl 2001) and using untreated group as control. **RG:** reference gene. doi:10.1371/journal.pone.0087514.g004

*GST* also exhibited no apparent differences ( $P > 0.05$ ) (Table 2; Fig. 4 D–H). However, significant expression differences were found between the most stable reference genes for all eight insecticides, *EF1α*, *TUB1α* and *GADPH*, and *18S rRNA*, the optimal reference gene recommended previously Fig. 4 I, [22].

**Discussion**

There exists no doubt that the qRT-PCR technology has made the quantitative determination of gene expression more convenient than ever before. However, extreme care must be taken for the selection of internal reference genes before their application of qRT-PCR. It has been documented that the selection of suitable reference genes is very important to obtain reliable and accurate data [2,3,46]. Currently, however, many common reference genes are used as internal controls without any evaluation of their variance and instability, and most publications only use a single internal control for normalization. These un-validated single reference genes, however, were proved to be not always reliable under various experimental conditions [12–16]. Therefore, more and more biologists pay their attention to the selection and

validation of reliable reference gene(s) expressed stably regardless of different experimental conditions from the species they are interested in, in order to avoid unnecessary errors in qRT-PCR analysis.

Insecticide resistance is becoming a serious barrier for the sustainable control of pest insects. And the identification of insecticide resistance mechanisms would provide ways of detection and management of resistance [47]. The qPCR has been extensively used to uncover the mechanisms of insecticide resistance, and it has been proven by a lot of publications that the overexpression of detoxifying enzymes and the reduced expression of insecticide target genes were responsible for insecticide resistance [48–51]. Up to date, however, no universal and reliable reference genes were selected and evaluated in insects stressed with different classes of insecticides.

In the present work, a total of eight candidate reference genes were validated in the tobacco whitefly treated with eight commonly used insecticides for the control of this pest.

According to the final ranking order calculated by *RefFinder*, the five most stable reference genes for the eight tested insecticides treated whitefly were selected (Fig. 2A–H). Even for imidacloprid,

acetamiprid and nitenpyram which belong to the same class of insecticides, the most stable reference genes were also different from each other (Fig. 2B–D). These results further proved that no single universal reference is available under different experiment conditions, and made the stability evaluation of reference gene necessary prior to the quantification of gene expression by qPCR.

Very interestingly, the relative expression level of two detoxifying enzymes, *Cyp6cm1* and *GST* from each of eight insecticides treated *B. tabaci* groups showed no significant difference between calculations using the selected reference gene set for each insecticide and calculations using the selected reference gene set for all eight insecticides (*EF1 $\alpha$* , *TUB1 $\alpha$*  and *GADPH*). Combined with the results of Li *et al* [22] that the expression of *EF1 $\alpha$*  and *GADPH* was stable between the thiamethoxam (a neonicotinoid insecticide) susceptible and resistant *B. tabaci* strains, we recommended that our selected reference gene set (*EF1 $\alpha$* , *TUB1 $\alpha$*  and *GADPH*) can be used as reliable internal reference for the data normalization in qRT-PCR experiments using *B. tabaci* treated with different insecticides.

Li *et al* [22] suggested that *18S rRNA* was stably expressed in *B. tabaci* when treated with thiamethoxam or under different

temperatures (4.0, 25.0, and 37.5°C). Based on the overall ranking by *RefFinder*, however, it was identified as the least stable reference gene in our study. When normalized with *18S rRNA*, expressions of *Cyp6cm1* and *GST* in *B. tabaci* treated with nitenpyram were significantly higher than those normalized with the set of most stable reference genes (Fig. 4I). These combined data strongly suggested the necessity of conducting customized reference gene selection for each and every experimental condition.

## Supporting Information

### Table S1 Toxicity of eight insecticides to adults of *Bemisia tabaci* Mediterranean.

(DOC)

## Author Contributions

Conceived and designed the experiments: PL XZ XG. Performed the experiments: PL YG. Analyzed the data: PL YG. Contributed reagents/materials/analysis tools: XG. Wrote the paper: PL XZ.

## References

- Bustin S (2000) Absolute quantification of mRNA using real-time reverse transcription polymerase chain reaction assays. *J Mol Endocrinol* 25: 169–193.
- Bustin S, Benes V, Nolan T, Pfaffl M (2005) Quantitative real-time RT-PCR—a perspective. *J Mol Endocrinol* 34: 597–601.
- VanGuilder H, Vrana K, Freeman W (2008) Twenty-five years of quantitative PCR for gene expression analysis. *Biotechniques* 44: 619–626.
- Citri A, Pang ZP, Südhof TC, Wernig M, Malenka RC (2012) Comprehensive qPCR profiling of gene expression in single neuronal cells. *Nat Protoc* 7: 118–117.
- Bustin SA, Benes V, Garson J, Hellemans J, Huggett J, *et al.* (2009) The MIQE guidelines: Minimum information for publication of quantitative real-time PCR experiments. *Clin Chem* 55: 611–622.
- Udvardi MK, Czechowski T, Scheible W-R (2008) Eleven golden rules of quantitative RT-PCR. *Plant Cell* 20:1736–1737.
- Huggett J, Dheda K, Bustin S, Zumla A (2005) Real-time RT-PCR normalization; strategies and considerations. *Genes and immunity* 6 :279–284.
- Giménez MJ, Pistón F, Atienza SG (2011) Identification of suitable reference genes for normalization of qPCR data in comparative transcriptomics analyses in the Triticeae. *Planta* 233 : 163–173.
- Artico S, Nardeli SM, Brillhante O, Grossi-de-Sa MF, Alves-Ferreira M (2010) Identification and evaluation of new reference genes in *Gossypium hirsutum* for accurate normalization of real-time quantitative RT-PCR data. *BMC Plant Biol* 10 :49.
- Derveaux S, Vandesompele J, Hellemans J (2010) How to do successful gene expression analysis using real-time PCR. *Methods* 50:227–230.
- Vandesompele J, De Preter K, Pattyn F, Poppe B, Van Roy N, *et al.* (2002) Accurate normalization of real-time quantitative RT-PCR data by geometric averaging of multiple internal control genes. *Genome Biol* 3: RESEARCH0034.
- Coulson DTR, Brockbank S, Quinn JG, Murphy S, Ravid R, *et al.* (2008) Identification of valid reference genes for the normalization of RT qPCR gene expression data in human brain tissue. *BMC Mol Biol* 9:46.
- Tricarico C, Pinzani P, Bianchi S, Paglierani M, Distante V, *et al.* (2002) Quantitative real-time reverse transcription polymerase chain reaction: normalization to rRNA or single housekeeping genes is inappropriate for human tissue biopsies. *Anal Biochem* 309: 293–300.
- Lin YL, Lai ZX (2010) Reference gene selection for qPCR analysis during somatic embryogenesis in longan tree. *Plant Sci* 178: 359–365.
- Cao S, Zhang X, Ye N, Fan X, Mou S, *et al.* (2012) Evaluation of putative internal reference genes for gene expression normalization in *Nannochloropsis* sp. by quantitative real-time RT-PCR. *Biochemical and Biophysical Research Communications* 421(1): 118–123.
- An Y, Reimers K, Allmeling C, Liu J, Lazaridis A, *et al.* (2012) Validation of differential gene expression in muscle engineered from rat groin adipose tissue by quantitative real-time PCR. *Biochem Biophys Res Commun* 421(4): 736–742.
- Van Hiel MB, Van Wielendaale P, Temmerman L, Van Soest S, Vuerinckx K, *et al.* (2009) Identification and validation of housekeeping genes in brains of the desert locust *Schistocerca gregaria* under different developmental conditions. *BMC Mol Biol* 10:56.
- Shen GM, Jiang HB, Wang XN, Wang JJ (2010) Evaluation of endogenous references for gene expression profiling in different tissues of the oriental fruit fly *Bactrocera dorsalis* (Diptera: Tephritidae). *BMC Mol Biol* 11: 76.
- Ponton F, Chapuis M, Pernice M, Sword GA, Simpson SJ (2011) Evaluation of potential reference genes for reverse transcription-qPCR studies of physiological responses in *Drosophila melanogaster*. *J Insect Physiol* 57: 840–850.
- Rajarapu SP, Mamidala P, Mittapalli O (2012) Validation of reference genes for gene expression studies in the emerald ash borer (*Agrius planipennis*). *Insect Sci* 19(1):41–46.
- Fu W, Xie W, Zhang Z, Wang S, Wu Q, *et al.* (2013) Exploring valid reference genes for quantitative real-time PCR analysis in *Plutella xylostella* (Lepidoptera: Plutellidae). *Int J Biol Sci* 9(8):792–802.
- Li RM, Xie W, Wang SL, Wu QJ, Yang NN, *et al.* (2013) Reference Gene selection for qRT-PCR analysis in the sweetpotato whitefly, *Bemisia tabaci* (Hemiptera:Aleyrodidae). *PLoS ONE* 8(1): e53006.
- Cheng D, Zhang Z, He X, Liang G (2013) Validation of reference genes in *Solenopsis invicta* in different developmental stages, castes and tissues. *PLoS One* 8(2): e57718
- Teng X, Zhang Z, He G, Yang L, Li F (2012) Validation of reference genes for quantitative expression analysis by real-time RT-PCR in four Lepidopteran Insects. *J Insect Sci* 12:1–17.
- De Barro PJ, Liu SS, Boykin LM, Dinsdale AB (2011) *Bemisia tabaci*: a statement of species status. *Annu Rev Entomol* 56:1–19
- Ahmad M, Arif MI, Ahmad Z, Denholm I (2002) Cotton whitefly (*Bemisia tabaci*) resistance to organophosphate and pyrethroid insecticides in Pakistan. *Pest Manag Sci* 58:203–208.
- El Kady H, Devine GJ (2003) Insecticide resistance in Egyptian populations of the cotton whitefly, *Bemisia tabaci* (Hemiptera: Aleyrodidae). *Pest Manag Sci* 59: 865–871.
- Horowitz AR, Kontsedalov S, Khasdan V, Ishaaya I (2005) Biotypes B and Q of *Bemisia tabaci* and their relevance to neonicotinoid and pyriproxyfen resistance. *Arch. Insect Biochem. Physiol* 58:216–225.
- Roditakis E, Roditakis NE, Tsagkarakou A (2005) Insecticide resistance in *Bemisia tabaci* (Homoptera: Aleyrodidae) populations from Crete. *Pest Manag Sci* 61:577–582.
- Luo C, Jones CM, Devine G, Zhang F, Denholm I, *et al.* (2010) Insecticide resistance in *Bemisia tabaci* biotype Q (Hemiptera: Aleyrodidae) from China. *Crop Prot* 29: 429–434.
- Wang ZY, Yan HF, Yang YH, Wu YD (2010) Biotype and insecticide resistance status of the whitefly *Bemisia tabaci* from China. *Pest Manag Sci* 66:1360–1366.
- Zhang N, Liu C, Yang F, Dong S, Han Z (2012) Resistance mechanisms to chlorpyrifos and F392W mutation frequencies in the acetylcholine esterase *ace1* allele of field populations of the tobacco whitefly, *Bemisia tabaci* in China. *Journal of Insect Science* 12:41.
- Yuan L, Wang S, Zhou J, Du Y, Zhang Y, *et al.* (2012) Status of insecticide resistance and associated mutations in Q-biotype of whitefly, *Bemisia tabaci*, from eastern China. *Crop Protection* 31: 67c71.
- Byrne FJ, Gorman KL, Cahill M, Denholm I, Devonshire AL (2000) The role of B-type esterases in conferring insecticide resistance in the tobacco whitefly, *Bemisia tabaci* (Genn.). *Pest Manag Sci* 56: 867–874.
- Rauch N, Nauen R (2003) Identification of biochemical markers linked to neonicotinoid cross resistance in *Bemisia tabaci* (Hemiptera: Aleyrodidae). *Arch Insect Biochem Physiol* 54: 165–176.
- Feng Y, Wu Q, Wang S, Chang X, Xie W, *et al.* (2010) Cross-resistance study and biochemical mechanisms of thiamethoxam resistance in B-biotype *Bemisia tabaci* (Hemiptera: Aleyrodidae). *Pest Manag Sci* 66: 313–318.

37. Karunker I, Benting J, Lueke B, Ponge T, Nauen R, et al. (2008) Over-expression of cytochrome P450 CYP6CM1 is associated with high resistance to imidacloprid in the B and Q biotypes of *Bemisia tabaci* (Hemiptera: Aleyrodidae). *Insect Biochem Mol Biol* 38(6):634–44.
38. Karunker I, Morou E, Nikou D, Nauen R, Sertchook R, et al. (2009) Structural model and functional characterization of the *Bemisia tabaci* CYP6CM1vQ<sub>2</sub> a cytochrome P450 associated with high levels of imidacloprid resistance. *Insect Biochem Mol Biol* 39(10):697–706.
39. Scharlaken B, Graaf DC, de Goossens K, Brunain M, Peelman IJ, et al. (2008) Reference gene selection for insect expression studies using quantitative real-time PCR: the head of the honeybee, *Apis mellifera*, after a bacterial challenge. *Journal of Insect Science (Tucson)* 8: 33.
40. Lord JC, Hartzer K, Toutges M, Oppert B (2010) Evaluation of quantitative PCR reference genes for gene expression studies in *Tribolium castaneum* after fungal challenge. *J Microbiol Methods* 80:219–221.
41. Liang P, Tian YA, Biondi A, Desneux N, Gao XW (2012) Short-term and transgenerational effects of the neonicotinoid nitenpyram on susceptibility to insecticides in two whitefly species. *Ecotoxicology* 21(7):1889–1898.
42. Pfaffl MW (2001) A new mathematical model for relative quantification in real-time RT-PCR. *Nucleic Acids Res* 29: e45.
43. Andersen CL, Jensen JL, Ørntoft TF (2004) Normalization of real-time quantitative RT-PCR data: a model-based variance estimation approach to identify genes suited for normalization, applied to bladder and colon cancer data sets. *Cancer Res* 64: 5245–5250.
44. Pfaffl MW, Tichopad A, Prgomet C, Neuvians TP (2004) Determination of stable housekeeping genes, differentially regulated target genes and sample integrity: BestKeeper-Excel-based tool using pair-wise correlations. *Biotechnology Letters* 26:509–515.
45. Silver N, Best S, Jiang J, Thein SL (2006) Selection of housekeeping genes for gene expression studies in human reticulocytes using real-time PCR. *BMC molecular biology* 7:33.
46. Bustin SA, Beaulieu J, Huggett J, Jaggi R, Kibenge F, et al. (2010) MIQE précis: Practical implementation of minimum standard guidelines for fluorescence-based quantitative real-time PCR experiments. *BMC Mol Biol* 11: 74.
47. Perry T, Batterham P, Daborn PJ (2011) The biology of insecticidal activity and resistance. *Insect Biochem Mol Biol* 41(7):411–22.
48. Wen Y, Liu Z, Bao H, Han Z (2009) Imidacloprid resistance and its mechanisms in field populations of brown planthopper, *Nilaparvata lugens* Stål in China. *Pestic Biochem Physiol* 94:36–42.
49. Puinean AM, Foster SP, Oliphant L, Denholm I, Field LM, et al. (2010) Amplification of a cytochrome p450 gene is associated with resistance to neonicotinoid insecticides in the aphid *Myzus persicae*. *PLoS Genet* 6(6): e1000999.
50. Bass C, Puinean AM, Andrews M, Culter P, Daniels M, et al. (2011) Mutation of a nicotinic acetylcholine receptor beta subunit is associated with resistance to neonicotinoid insecticides in the aphid *Myzus persicae*. *BMC Neuroscience* 12: 51.
51. Markussen MDK, Kristensen M (2010) Low expression of nicotinic acetylcholine receptor subunit Md alpha 2 in neonicotinoid-resistant strains of *Musca domestica* L. *Pest Management Science* 66(11):1257–1262.
